# Supplementary material for: The potential of high-speed rail freight in Europe: how is a modal shift from road to rail possible for low-density high value cargo?
Source: Springer Nature journal article supplement (doi:10.1186/s12544-020-00453-3), 2021-01-05
Supplement: MOESM1 [file 18737164]

**Description of the calculated country specific track charges for 2030**

Austria: Price basis are the ÖBB network-statements of the years 2020 and 2021. For conventional rail freight we selected: non-shunted freight traffic (train- and gross-tonne kilometre components), including traction unit factor Category A, supplement for congested rail infrastructure: sum charge 2020 [€/train km]: 15.51, sum charge 2021 [€/train km]: 15.70, resulting in a mean annual increase of 1.24 %. For HSRF we selected: public service long-distance passenger traffic (train- and gross-tonne kilometre components), including traction unit factor Category A, supplement for congested rail infrastructure: sum charge 2020 [€/train km]: 16.22, sum charge 2021 [€/train km]: 16.55, resulting in a mean annual increase of 2.01 %.

France: Price basis are the SNCF network-statements of the years 2020 and 2021. For conventional rail freight we include electric traction charge, charge for transmission and distribution of electric power (only for the year 2020), net traffic charge and charge for use of the short link line at Mulhouse: sum charge 2020 [€/train km]: 1.84, sum charge 2021 [€/train km]: 1.78. For HSRF we selected: high-speed track type, including electric traction charge, charge for transmission and distribution of electric power (only for the year 2020), net traffic charge and charge for use of the short link line at Mulhouse: sum charge 2020 [€/train km]: 20.66, sum charge 2021 [€/train km]: 21.90. The annual increase is calculated as the mean of high-speed passenger and freight service because the tariff system changed in both segments (i.e. the charge for transmission and distribution of electric power was reallocated in the year 2021). These assumptions represent an annual increase of 1.42 %.

Germany: Price basis are the DB Netz AG network-statements of the years 2020 and 2021. For conventional rail freight we selected: market segment: rail freight transport - standard, including suffix “Express”: sum charge 2020 [€/train km]: 5.13, sum charge 2021 [€/train km]: 5.21, resulting in a mean annual increase of 2.56 %. For HSRF we selected: market segment: long-distance passenger traffic - metro Tag Max (v ≥ 160 km/h), including suffix “Express”: sum charge 2020 [€/train km]: 13.80, sum charge 2021 [€/train km]: 14.06, resulting in a mean annual increase of 2.20 %.

Spain: Price basis is the Adif network-statement of the year 2020. For conventional rail freight we selected: line, train type: freight, including capacity allocation, railway line usage and electric traction facilities tariff: sum charge 2020 [€/train km]: 0.21. For HSRF we selected: line type: high-speed > 200 km/h, train type: long-distance passenger, including capacity allocation, railway line usage and electric traction facilities tariff: sum charge 2020 [€/train km]: 7.52. As the Adif network-statement of the year 2021 has not yet been published, we assume an annual increase of 2.00 %.

For all countries scheduling, service charges, delay penalties and noise bonus are excluded. Terminal service costs are included in the transhipment costs (see unit handling costs in section 3).
